# Supplementary material
Source: PubMed Central journal article supplement (PMC5210094)

Fig 1G, 2E

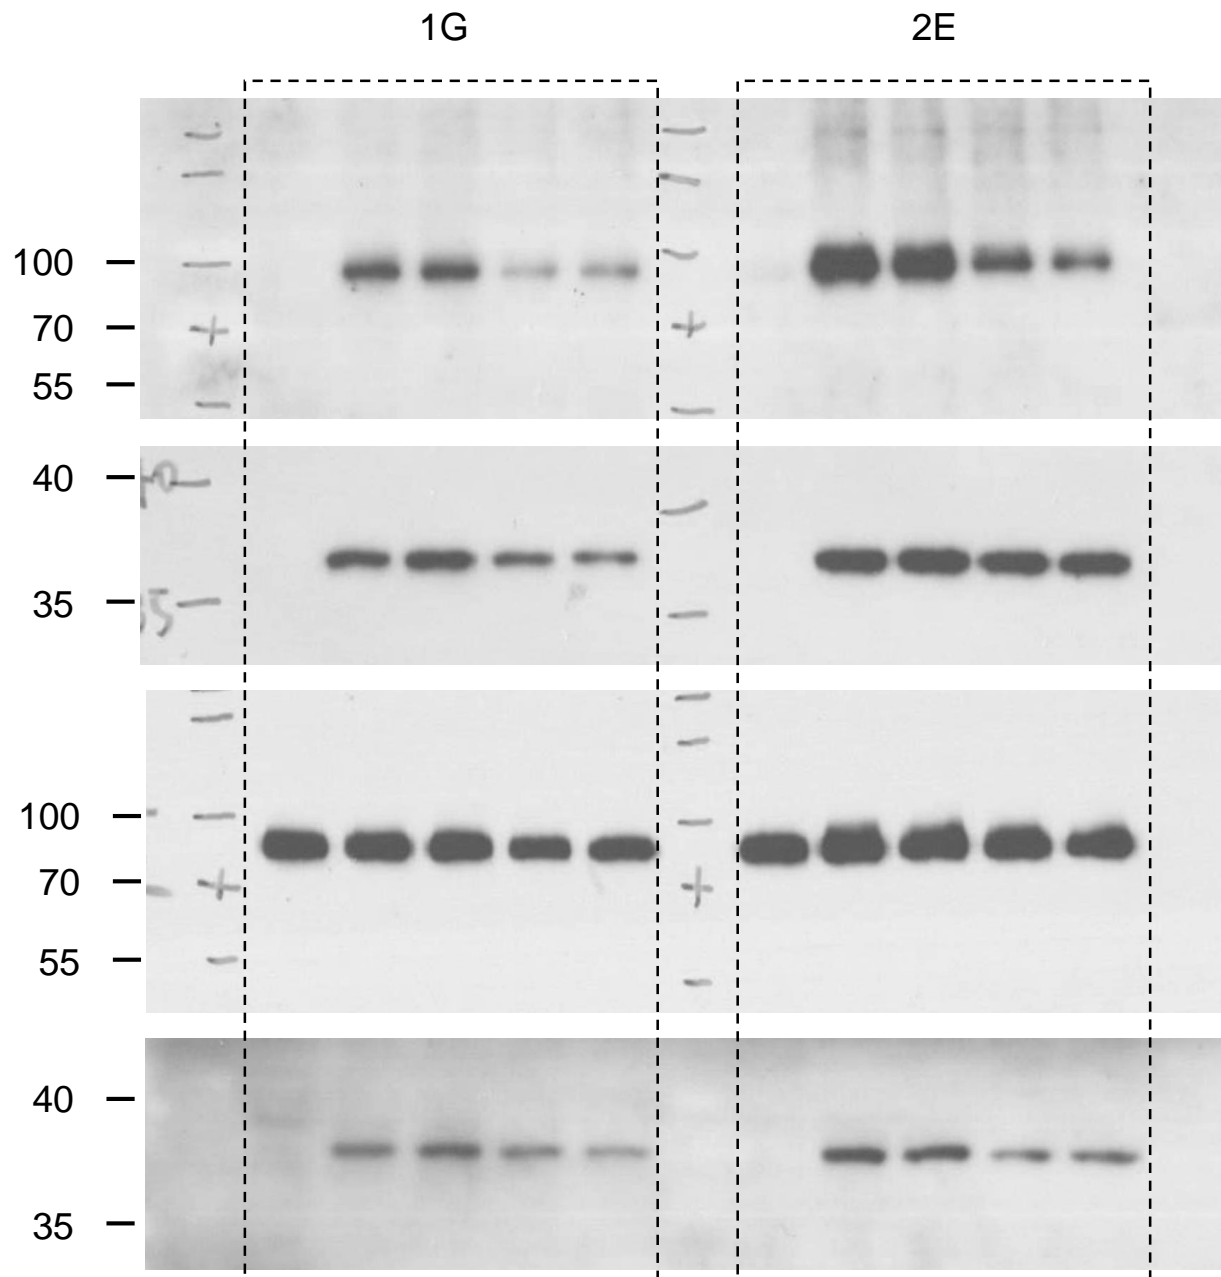

Supplement: EMBR-18-72-s004.pdf [file EMBR-18-72-s004.pdf]

Fig 3A

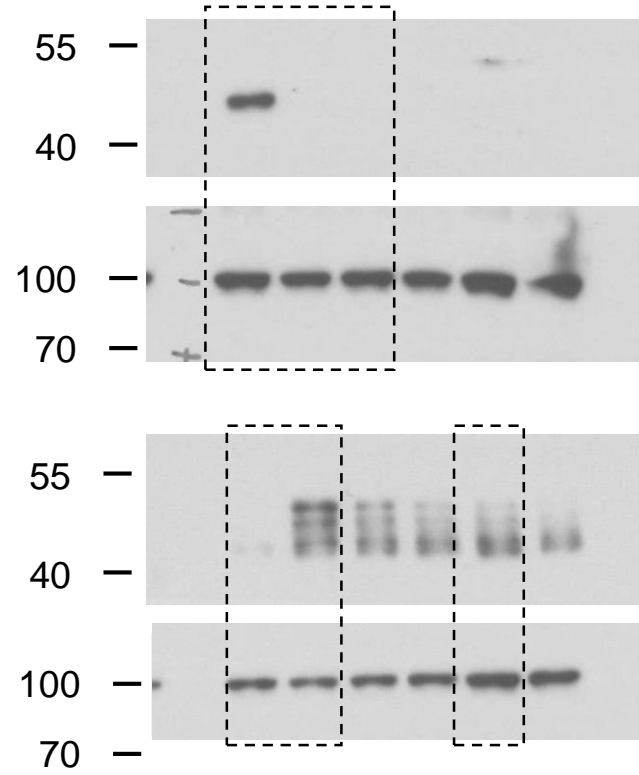

Fig 3D

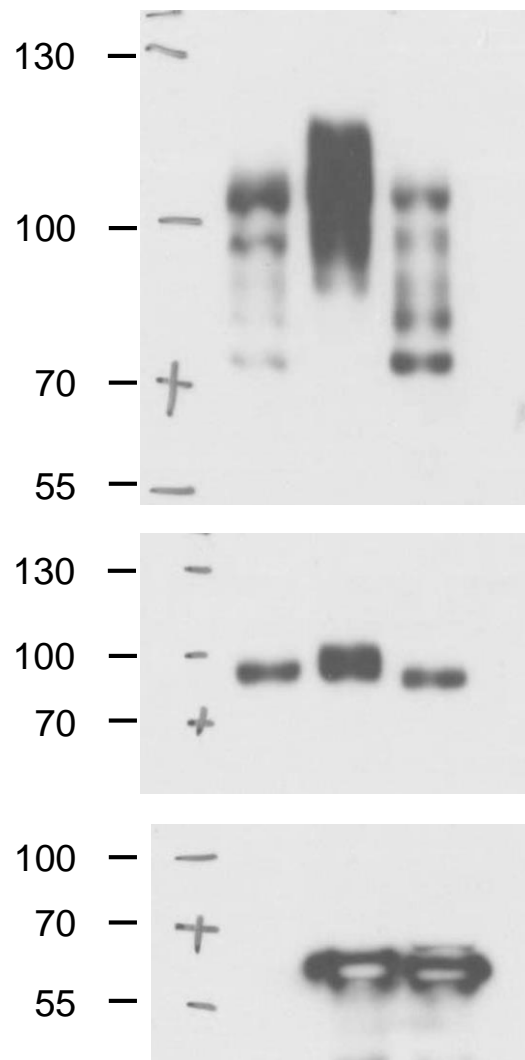

Fig 3E

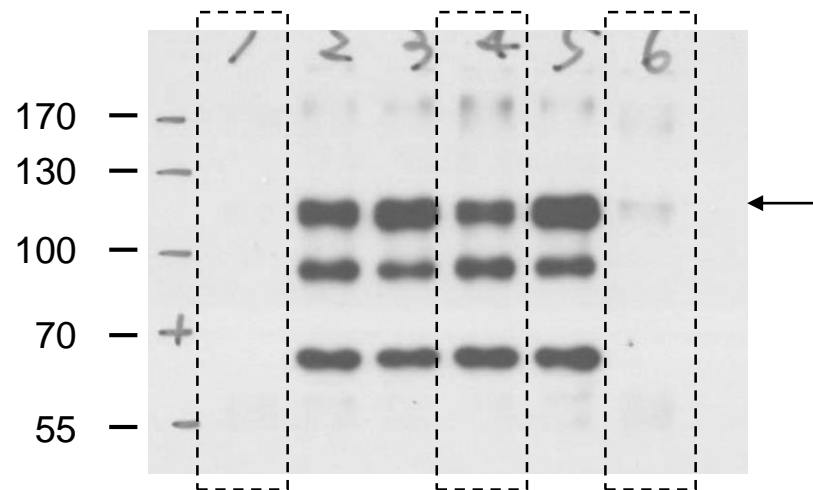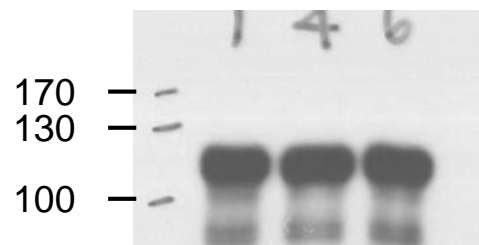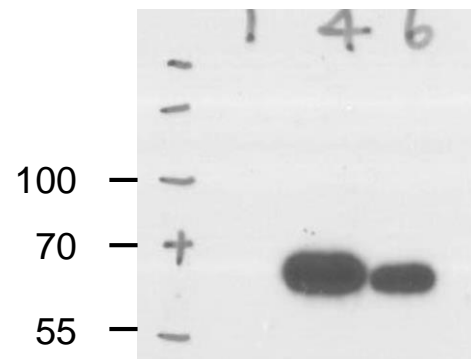

Supplement: EMBR-18-72-s005.pdf [file EMBR-18-72-s005.pdf]
